# Supplementary material for: Patient-Derived Mutant Forms of NFE2L2/NRF2 Drive Aggressive Murine Hepatoblastomas
Source: PubMed Central journal article supplement — Cell Mol Gastroenterol Hepatol. 2021 Feb 20;12(1):199–228. doi: 10.1016/j.jcmgh.2021.02.004 (PMC8102178; doi:10.1016/j.jcmgh.2021.02.004), 2021-02-20
Supplement: mmc1.pdf [file mmc1.pdf]

**Supplementary Table S1: The 821 gene expression differences shown in Fig. 5D and E. Gene names and accession numbers are arranged in the order depicted in the Figure and as determined by hierarchical clustering. All values are expressed as CPM.**

| NAME          | $\Delta 90+\text{YAP}^{\text{S127A}}$ | $\Delta 90+\text{YAP}^{\text{S127A}} + \text{NFE2L2-WT}$ | $\Delta 90+\text{YAP}^{\text{S127A}} + \text{L30P/R34P}$ |
|---------------|---------------------------------------|----------------------------------------------------------|----------------------------------------------------------|
| Lypla1        | 89.45                                 | 139.74                                                   | 152.8                                                    |
| Xkr9          | 4.33                                  | 11.73                                                    | 18.12                                                    |
| Smap1         | 36.67                                 | 50.95                                                    | 59.67                                                    |
| Tpp2          | 38.63                                 | 63.87                                                    | 73.55                                                    |
| Atic          | 32.53                                 | 49.55                                                    | 84.25                                                    |
| Cab39         | 84.41                                 | 120.51                                                   | 132.51                                                   |
| Ugt1a6a       | 62.01                                 | 117.42                                                   | 211.19                                                   |
| Ppip5k2       | 67.35                                 | 105.38                                                   | 110.39                                                   |
| Nr5a2         | 57.21                                 | 87.69                                                    | 91.31                                                    |
| BC003331      | 29.42                                 | 43.99                                                    | 52.76                                                    |
| Fmo4          | 7.12                                  | 15.2                                                     | 15.71                                                    |
| Degs1         | 89.35                                 | 132.95                                                   | 193.21                                                   |
| Lamc3         | 2.4                                   | 16.13                                                    | 69.32                                                    |
| Psm5          | 31.64                                 | 45.49                                                    | 66.86                                                    |
| Stom          | 36.59                                 | 79.26                                                    | 100.1                                                    |
| Ppp6c         | 34.27                                 | 48.35                                                    | 53.63                                                    |
| Gtdc1         | 8.6                                   | 13.09                                                    | 13.2                                                     |
| Ifih1         | 24.47                                 | 35.97                                                    | 39.96                                                    |
| Qser1         | 28.19                                 | 46.93                                                    | 51.06                                                    |
| Cops2         | 47.59                                 | 68.7                                                     | 79.07                                                    |
| Srxn1         | 47.54                                 | 256.41                                                   | 1463.35                                                  |
| Tm9sf4        | 67.47                                 | 93.14                                                    | 93.94                                                    |
| Slc7a11       | 2.31                                  | 60.89                                                    | 393.48                                                   |
| Lxn           | 1.66                                  | 8.89                                                     | 13.43                                                    |
| Arfp1         | 27.11                                 | 37.52                                                    | 46.67                                                    |
| Gba           | 23.89                                 | 33.06                                                    | 37.24                                                    |
| S100a8        | 1.93                                  | 12.98                                                    | 17.55                                                    |
| S100a9        | 2.53                                  | 21.29                                                    | 29.7                                                     |
| Prune         | 21.97                                 | 39.23                                                    | 53.46                                                    |
| Rnf115        | 26.29                                 | 36.9                                                     | 50.3                                                     |
| Trim33        | 25.17                                 | 36.15                                                    | 36.96                                                    |
| Chil3         | 0.47                                  | 5.59                                                     | 7.49                                                     |
| Cept1         | 36.43                                 | 57.59                                                    | 71.67                                                    |
| Gstm3         | 76.19                                 | 423.89                                                   | 1508.79                                                  |
| Gstm1         | 1335.19                               | 3516.03                                                  | 9635.56                                                  |
| Gstm4         | 23.8                                  | 78.17                                                    | 179.08                                                   |
| Slc25a24      | 53.65                                 | 90.13                                                    | 95.29                                                    |
| Ctbs          | 10.14                                 | 17.82                                                    | 18.38                                                    |
| Fpgt          | 11.42                                 | 19.92                                                    | 22.1                                                     |
| Trp53inp1     | 74.92                                 | 116.68                                                   | 155.1                                                    |
| Cpne3         | 80.16                                 | 127.53                                                   | 139.34                                                   |
| Manea         | 14.78                                 | 25.7                                                     | 30.04                                                    |
| Prkaa2        | 34.12                                 | 61.97                                                    | 133.86                                                   |
| Alpl          | 14.4                                  | 30.7                                                     | 35.79                                                    |
| Cd36          | 67.48                                 | 177.93                                                   | 237.38                                                   |
| Bre           | 23.82                                 | 37.24                                                    | 40.3                                                     |
| Cpeb2         | 22.91                                 | 36.71                                                    | 39.19                                                    |
| Pi4k2b        | 28.74                                 | 40.69                                                    | 42.04                                                    |
| Ugdh          | 113.66                                | 275.17                                                   | 842.9                                                    |
| Dcun1d4       | 26.27                                 | 40.18                                                    | 47.23                                                    |
| Ugt2b34       | 340.34                                | 703.37                                                   | 1110.88                                                  |
| Slc26a1       | 102.57                                | 182.48                                                   | 190.6                                                    |
| Serpine1      | 11.66                                 | 31.64                                                    | 67.88                                                    |
| Met           | 56.75                                 | 92.77                                                    | 109.51                                                   |
| Tmem209       | 19.11                                 | 28.18                                                    | 36.89                                                    |
| Akr1d1        | 105.66                                | 207.32                                                   | 212.13                                                   |
| D630045J12Rik | 14.45                                 | 24.71                                                    | 53.55                                                    |
| Stambp        | 12.3                                  | 19.38                                                    | 21.48                                                    |
| Eefsec        | 23.19                                 | 34.05                                                    | 38.43                                                    |
| Styk1         | 0.2                                   | 5.47                                                     | 19.35                                                    |
| Cyp2a12       | 198.15                                | 425.32                                                   | 480.92                                                   |
| Rhpn2         | 20.84                                 | 33.23                                                    | 43.89                                                    |
| A1987944      | 13.19                                 | 20.98                                                    | 27.47                                                    |
| C230091D08Rik | 7.19                                  | 12.45                                                    | 13.5                                                     |
| Mtmr10        | 32.26                                 | 45                                                       | 46.26                                                    |
| Picalm        | 98.35                                 | 160.2                                                    | 186.7                                                    |
| Tsku          | 51.69                                 | 132.28                                                   | 315.24                                                   |
| Tpp1          | 78.53                                 | 130.3                                                    | 131.03                                                   |
| Ppfibp2       | 14.53                                 | 24.14                                                    | 55.59                                                    |
| Acsn3         | 32.75                                 | 72.79                                                    | 77.88                                                    |
| Aldoa         | 123.75                                | 213.14                                                   | 325.82                                                   |
| Ifitm6        | 0.15                                  | 0.79                                                     | 2.29                                                     |
| Hpgd          | 89.6                                  | 145.96                                                   | 187.11                                                   |
| Itfg1         | 49.12                                 | 71.11                                                    | 90.99                                                    |
| Ces2c         | 2.65                                  | 13.95                                                    | 15.51                                                    |

Supplementary Table S2 (continued)

| NAME          | $\Delta 90+\text{YAP}^{\text{S127A}}$ | $\Delta 90+\text{YAP}^{\text{S127A}}$ +NFE2L2-WT | $\Delta 90+\text{YAP}^{\text{S127A}}$ +L30P/R34P |
|---------------|---------------------------------------|--------------------------------------------------|--------------------------------------------------|
| Nfatc3        | 35.46                                 | 53.42                                            | 54.09                                            |
| Nqo1          | 6.7                                   | 37.31                                            | 222.5                                            |
| Bco1          | 13.87                                 | 26.88                                            | 43.97                                            |
| Mmp8          | 0.11                                  | 3.04                                             | 4.5                                              |
| Raver1        | 37.48                                 | 59.41                                            | 67.32                                            |
| Gclc          | 169.37                                | 522.46                                           | 2071.87                                          |
| Gsta1         | 0.86                                  | 72.14                                            | 1057.15                                          |
| Gm10639       | 0.08                                  | 6.46                                             | 136.35                                           |
| Gsta2         | 3.85                                  | 59.54                                            | 602.85                                           |
| Ngp           | 1.35                                  | 16.06                                            | 21.3                                             |
| Ltf           | 0.75                                  | 12.15                                            | 18.71                                            |
| Nt5dc1        | 9.17                                  | 14.56                                            | 18.9                                             |
| Reep3         | 75.77                                 | 112.21                                           | 166.78                                           |
| Ugp2          | 163.27                                | 338.39                                           | 929.4                                            |
| Map2k4        | 31.41                                 | 51.24                                            | 51.38                                            |
| Srr           | 31.71                                 | 54.73                                            | 60.77                                            |
| Taok1         | 58.63                                 | 87.55                                            | 87.83                                            |
| 5730455P16Rik | 13.75                                 | 19.72                                            | 21.55                                            |
| Usp32         | 35.65                                 | 53.59                                            | 55.03                                            |
| Mmd           | 106.95                                | 171.02                                           | 176.54                                           |
| Tom11l        | 18.84                                 | 28.64                                            | 44.36                                            |
| Abcc3         | 94.89                                 | 194.96                                           | 341.12                                           |
| Pdk2          | 51.3                                  | 90.66                                            | 93.16                                            |
| Tmem106a      | 13.81                                 | 22.34                                            | 25.14                                            |
| 1810010H24Rik | 8.47                                  | 15.5                                             | 24.47                                            |
| Stxbp6        | 24.32                                 | 34.92                                            | 36.3                                             |
| Egln3         | 18.42                                 | 32.52                                            | 41.74                                            |
| Cfl2          | 42.49                                 | 59.63                                            | 79.43                                            |
| Hif1a         | 37.65                                 | 58.51                                            | 65.43                                            |
| Gpx2          | 0.72                                  | 7.79                                             | 60.66                                            |
| Susd6         | 58.33                                 | 85.04                                            | 91.57                                            |
| Gcnt2         | 19.6                                  | 30.89                                            | 34.47                                            |
| Ranbp9        | 28.6                                  | 39.73                                            | 41.18                                            |
| Erc6l2        | 16.86                                 | 24.3                                             | 28.78                                            |
| Erap1         | 64.72                                 | 103.66                                           | 107.73                                           |
| Pxk           | 28.69                                 | 40.06                                            | 47.74                                            |
| Vcl           | 54.81                                 | 93.53                                            | 156.26                                           |
| Ap3m1         | 45.35                                 | 75.29                                            | 75.71                                            |
| Samd8         | 31.96                                 | 48.54                                            | 65.49                                            |
| Ppif          | 24.28                                 | 36.59                                            | 37.13                                            |
| Ankrd28       | 36.35                                 | 56.63                                            | 61.64                                            |
| Ero1l         | 26.48                                 | 43.63                                            | 61.13                                            |
| Abcc4         | 21.18                                 | 143.7                                            | 1011.15                                          |
| AW549877      | 29.84                                 | 46.89                                            | 47.71                                            |
| Golph3        | 64.21                                 | 98.32                                            | 103.56                                           |
| Laptm4b       | 27.93                                 | 40.99                                            | 45.28                                            |
| Grina         | 108.85                                | 220.91                                           | 280.46                                           |
| Xpnpep3       | 21.22                                 | 30.07                                            | 31.2                                             |
| Slc38a2       | 117.97                                | 180.55                                           | 211.31                                           |
| Dazap2        | 114.85                                | 163.34                                           | 193.57                                           |
| Igfbp6        | 2.01                                  | 30.25                                            | 38.94                                            |
| Mapk1         | 84.35                                 | 121.93                                           | 145                                              |
| Cldn1         | 72.22                                 | 137.78                                           | 176.29                                           |
| Kpna1         | 34.79                                 | 53.14                                            | 64.03                                            |
| Pla1a         | 22.73                                 | 43.61                                            | 63.2                                             |
| Retnlg        | 0.2                                   | 2.87                                             | 3.76                                             |
| Tfg           | 55.62                                 | 81.2                                             | 87.02                                            |
| Gbe1          | 51.72                                 | 114.83                                           | 266.29                                           |
| Mpc1          | 83.83                                 | 145.93                                           | 206.33                                           |
| BC004004      | 50.05                                 | 75.05                                            | 83.42                                            |
| Tbc1d5        | 21.81                                 | 32.19                                            | 37.54                                            |
| Sos1          | 26.21                                 | 37.38                                            | 38.3                                             |
| Lrrprc        | 48.54                                 | 70.82                                            | 101.65                                           |
| Pcdhgc3       | 0.73                                  | 7.49                                             | 9.51                                             |
| Prr16         | 8.01                                  | 13.44                                            | 14.41                                            |
| Seh1l         | 44.38                                 | 63.94                                            | 69.68                                            |
| Dym           | 23.73                                 | 33.71                                            | 38.18                                            |
| Rtn3          | 111.43                                | 165.12                                           | 213.03                                           |
| Asah2         | 18.33                                 | 28.73                                            | 31.76                                            |
| Ide           | 76.06                                 | 123.18                                           | 152.95                                           |
| Gm10768       | 100.05                                | 220.79                                           | 301.4                                            |
| Zdhhc6        | 44.81                                 | 63.13                                            | 65.56                                            |
| Maoa          | 18.45                                 | 61.96                                            | 354.83                                           |
| Maob          | 57.96                                 | 97.14                                            | 99.05                                            |
| Klhl13        | 20.78                                 | 41.31                                            | 87.91                                            |

Supplementary Table S2 (continued)

| NAME          | $\Delta 90+YAP^{S127A}$ | $\Delta 90+YAP^{S127A} +NFE2L2-WT$ | $\Delta 90+YAP^{S127A} +L30P/R34P$ |
|---------------|-------------------------|------------------------------------|------------------------------------|
| Mttr1         | 21.12                   | 34.15                              | 41.81                              |
| Atp6ap1       | 71.45                   | 99.48                              | 102.03                             |
| Ubqln2        | 28.95                   | 46.68                              | 58.58                              |
| Rgl1          | 15.74                   | 7.87                               | 21.5                               |
| Tor3a         | 16.76                   | 9                                  | 20.11                              |
| Rcsd1         | 9.86                    | 4.7                                | 11.6                               |
| Arhgap30      | 14.12                   | 6.51                               | 17.09                              |
| Ifi203        | 7.17                    | 3.55                               | 9.19                               |
| Tnfaip8l2     | 5.17                    | 2.3                                | 5.61                               |
| Tinagl1       | 47.44                   | 25.75                              | 85.1                               |
| Man1c1        | 10.19                   | 4.53                               | 10.76                              |
| C1qc          | 93.6                    | 34                                 | 109.61                             |
| C1qa          | 126.92                  | 51.33                              | 146.21                             |
| Anxa3         | 89.59                   | 48.98                              | 163.62                             |
| Dok1          | 7.43                    | 3.49                               | 7.54                               |
| Gmfg          | 5.85                    | 2.85                               | 6.02                               |
| Tmem86a       | 14.88                   | 7.31                               | 17.3                               |
| Lyve1         | 5.1                     | 1.27                               | 11.61                              |
| Far1          | 12.87                   | 4.44                               | 13.58                              |
| Pycard        | 3.27                    | 1.23                               | 3.35                               |
| Ifitm1        | 2.57                    | 0.84                               | 2.58                               |
| Adgre5        | 35.42                   | 19.07                              | 49.96                              |
| AB124611      | 4.58                    | 1.85                               | 8.1                                |
| 2810417H13Rik | 13.86                   | 6.3                                | 14                                 |
| Cnn2          | 26.89                   | 12.8                               | 29.11                              |
| Arhgap9       | 7.25                    | 2.84                               | 7.37                               |
| Pmp22         | 17.51                   | 4.3                                | 23.63                              |
| Slfn5         | 21.07                   | 9.03                               | 23                                 |
| Abi3          | 14.27                   | 8.03                               | 15.77                              |
| Trib2         | 7.35                    | 2.8                                | 8.25                               |
| Ly86          | 6.85                    | 2.87                               | 8.66                               |
| Tgfb1         | 50.18                   | 24.18                              | 52.2                               |
| 4930486L24Rik | 4.61                    | 0.85                               | 8.44                               |
| Ctla2b        | 3.93                    | 1.5                                | 3.99                               |
| Klhl6         | 5.7                     | 2.52                               | 6.27                               |
| Hcls1         | 18.7                    | 9.26                               | 21.74                              |
| Aif1          | 9.9                     | 3.53                               | 10.2                               |
| Stard8        | 9.13                    | 4.25                               | 10.4                               |
| Pcmd1         | 54.33                   | 84.1                               | 82.95                              |
| Tmem14a       | 3.22                    | 6.24                               | 4.64                               |
| Raph1         | 84.98                   | 125.24                             | 90.89                              |
| Steap3        | 45.54                   | 79.61                              | 63.63                              |
| Cdk18         | 30.87                   | 48.61                              | 41.59                              |
| Cfhr3         | 2.49                    | 6.29                               | 4.39                               |
| Gm4788        | 88.07                   | 157.46                             | 109.61                             |
| Cfhr2         | 55.5                    | 116.83                             | 75.66                              |
| Rabgap11      | 24.84                   | 35.48                              | 32.55                              |
| Klhdc9        | 0.94                    | 2.16                               | 1.68                               |
| Chml          | 8.78                    | 16                                 | 14.8                               |
| Pter          | 68.33                   | 111.53                             | 98.27                              |
| Rsu1          | 30.76                   | 45.51                              | 38.79                              |
| Stam          | 19.08                   | 28.52                              | 26.5                               |
| Mrps2         | 23.65                   | 35.93                              | 34.65                              |
| 1110008P14Rik | 12.85                   | 19.73                              | 14.42                              |
| Nr6a1         | 5.94                    | 10.38                              | 6.79                               |
| Acvr2a        | 25.66                   | 38.05                              | 33.01                              |
| Nfe2l2        | 140.83                  | 391.99                             | 258.8                              |
| Zfp385b       | 15.93                   | 26.34                              | 22.23                              |
| Tcp1l1l1      | 13.76                   | 23.85                              | 19.35                              |
| BC052040      | 8.67                    | 13.65                              | 13.56                              |
| Adal          | 12.04                   | 17.5                               | 17                                 |
| Psmf1         | 27.15                   | 42.98                              | 41.44                              |
| Ncoa6         | 34.45                   | 54.35                              | 47.24                              |
| Rbm38         | 5.08                    | 9.74                               | 8.59                               |
| Bche          | 67.8                    | 139.57                             | 118.33                             |
| Sf3b4         | 28.73                   | 39.36                              | 37.84                              |
| Hfe2          | 27.45                   | 70.4                               | 52.96                              |
| Gdap2         | 32.81                   | 51.17                              | 47.04                              |
| Alg14         | 10.85                   | 18.5                               | 15.22                              |
| Sec24b        | 40                      | 55.41                              | 55.08                              |
| Ppa2          | 26.43                   | 37.65                              | 30.54                              |
| Mob3b         | 31.1                    | 56.08                              | 52.48                              |
| Angptl3       | 199.22                  | 420.99                             | 396.87                             |
| Tmem69        | 10.57                   | 16.15                              | 13.97                              |
| Elovl1        | 53.65                   | 87.06                              | 80.61                              |

## Supplementary Table S2 (continued)

| NAME          | $\Delta 90+YAP^{S127A}$ | $\Delta 90+YAP^{S127A} +NFE2L2-WT$ | $\Delta 90+YAP^{S127A} +L30P/R34P$ |
|---------------|-------------------------|------------------------------------|------------------------------------|
| Mapre3        | 20.49                   | 38.24                              | 36.57                              |
| Atxn2         | 50.53                   | 72.82                              | 66.9                               |
| Orai1         | 17.32                   | 25.14                              | 24.63                              |
| Cyp3a13       | 27.17                   | 52.43                              | 35.02                              |
| Bri3          | 35.06                   | 58.18                              | 51.21                              |
| Baiap2l1      | 37.99                   | 60.93                              | 55.46                              |
| Cyp3a59       | 9.64                    | 25.11                              | 22.22                              |
| Peg10         | 3.72                    | 10.97                              | 4.56                               |
| Wasl          | 74.9                    | 115.12                             | 114.47                             |
| Zfp800        | 11.76                   | 17.99                              | 17.31                              |
| Mkln1         | 45.36                   | 63.32                              | 60.26                              |
| Zyx           | 49.31                   | 79.37                              | 63.65                              |
| Wipf3         | 26.75                   | 47.06                              | 37.94                              |
| Kdm3a         | 19.14                   | 29.59                              | 25.73                              |
| Tmsb10        | 44.91                   | 89.91                              | 83.42                              |
| Fmrd4b        | 51.64                   | 79.66                              | 67.8                               |
| Bhlhe40       | 81.57                   | 149.58                             | 116.64                             |
| Setd5         | 61.83                   | 87.7                               | 78.67                              |
| Tmcc1         | 20.31                   | 31.2                               | 27.61                              |
| Slc6a12       | 31.37                   | 57.03                              | 32.13                              |
| Atn1          | 54.43                   | 81.56                              | 67.41                              |
| Ceacam1       | 60.26                   | 119.53                             | 71.5                               |
| Zfp36         | 39.13                   | 63.74                              | 61.97                              |
| Ankrd27       | 69.16                   | 103.14                             | 93.37                              |
| Gm5595        | 2.34                    | 4.38                               | 3.37                               |
| Kdelr1        | 83.51                   | 124.55                             | 113.25                             |
| Cpeb1         | 17.31                   | 29.78                              | 23.28                              |
| Tmem135       | 53.05                   | 90.49                              | 89.33                              |
| Ints4         | 27.13                   | 39                                 | 35.78                              |
| Ppme1         | 29.34                   | 44.16                              | 42.96                              |
| Gm5601        | 1.15                    | 7.73                               | 6.3                                |
| Sult1a1       | 490.91                  | 1021.73                            | 852.73                             |
| Cdhr5         | 80.31                   | 126.58                             | 80.57                              |
| Slc22a18      | 53.09                   | 109.69                             | 103.71                             |
| Rbpms         | 67.37                   | 108.18                             | 98.15                              |
| Mtus1         | 167.03                  | 239.33                             | 196.71                             |
| Aadat         | 19.52                   | 37.21                              | 34.78                              |
| Tm6sf2        | 18.08                   | 39.26                              | 29.34                              |
| Tom1          | 31.07                   | 49.69                              | 41.18                              |
| Slc38a7       | 27.41                   | 36.63                              | 34.82                              |
| D230025D16Rik | 37.03                   | 57.92                              | 53.25                              |
| Acp5          | 59.61                   | 117.36                             | 114.73                             |
| Vwa5a         | 57.83                   | 98.85                              | 94.02                              |
| Ubl7          | 22.45                   | 36.93                              | 34.54                              |
| Dennd4a       | 30.9                    | 51.6                               | 50.15                              |
| Rbpms2        | 17.96                   | 30.87                              | 28.11                              |
| Ick           | 25.98                   | 39.71                              | 34.84                              |
| Rn7sk         | 2.29                    | 8.44                               | 5.72                               |
| Abhd14b       | 96.33                   | 158.2                              | 137.95                             |
| Camp          | 0.75                    | 4.7                                | 4.33                               |
| Rtp3          | 30.82                   | 47.08                              | 30.97                              |
| Cyp8b1        | 58.36                   | 168.07                             | 155.8                              |
| Tcaim         | 9.2                     | 15.9                               | 14.23                              |
| Lars2         | 72.21                   | 272.09                             | 234.47                             |
| Tab2          | 78.38                   | 113.66                             | 108.98                             |
| Sgk1          | 17.78                   | 37.97                              | 34.7                               |
| Ppa1          | 80.07                   | 128.01                             | 125.47                             |
| Scyl2         | 39.22                   | 60.79                              | 59.7                               |
| Mettl7b       | 225.22                  | 459.77                             | 318.37                             |
| Tug1          | 52.38                   | 77.79                              | 62.69                              |
| Ube2d-ps      | 4.66                    | 8.08                               | 6.14                               |
| 0610010F05Rik | 16.88                   | 24.42                              | 24.12                              |
| Timd2         | 41.81                   | 80.15                              | 76.21                              |
| Sec24a        | 65.07                   | 103.41                             | 96.32                              |
| Drg2          | 28.75                   | 40.64                              | 39.45                              |
| Asgr2         | 177.41                  | 329.02                             | 297.99                             |
| Ggt6          | 13.19                   | 26.11                              | 15.77                              |
| Ctns          | 17.26                   | 26.63                              | 21.07                              |
| Serpinf1      | 205.61                  | 483.72                             | 448.1                              |
| Ccl9          | 25.18                   | 52.84                              | 33.98                              |
| Dcakd         | 37.13                   | 51.4                               | 41.7                               |
| Prkca         | 13                      | 20.87                              | 18.17                              |
| Fam20a        | 26.19                   | 45.73                              | 29.56                              |
| Afmid         | 61.55                   | 112.06                             | 96.22                              |
| Gphn          | 33.87                   | 52.54                              | 50.62                              |

**Supplementary Table S2 (continued)**

| NAME          | $\Delta 90+\text{YAP}^{\text{S127A}}$ | $\Delta 90+\text{YAP}^{\text{S127A}} +\text{NFE2L2-WT}$ | $\Delta 90+\text{YAP}^{\text{S127A}} +\text{L30P/R34P}$ |
|---------------|---------------------------------------|---------------------------------------------------------|---------------------------------------------------------|
| Numb          | 31.03                                 | 43.67                                                   | 36.51                                                   |
| Serpina3n     | 158.42                                | 380.34                                                  | 238.4                                                   |
| Akr1e1        | 20.54                                 | 33.3                                                    | 27.5                                                    |
| Serpina9      | 12.42                                 | 20.88                                                   | 15.1                                                    |
| Zfp935        | 3.5                                   | 6.21                                                    | 5.57                                                    |
| Zfp729b       | 6.04                                  | 10.1                                                    | 9.31                                                    |
| Thrb          | 23.55                                 | 35.75                                                   | 31.54                                                   |
| Parp4         | 28.74                                 | 46.73                                                   | 44.43                                                   |
| Gm17066       | 13.04                                 | 20.74                                                   | 15.74                                                   |
| Cpq           | 59.01                                 | 84.48                                                   | 68.31                                                   |
| Rnf139        | 32.66                                 | 48.68                                                   | 44.86                                                   |
| St3gal1       | 83.01                                 | 146.19                                                  | 119.02                                                  |
| Pkp2          | 70.82                                 | 103.65                                                  | 85.89                                                   |
| Hrg           | 204.21                                | 569.6                                                   | 423.3                                                   |
| Kng1          | 1442.91                               | 2828.61                                                 | 1958.11                                                 |
| Pcyt1a        | 77.65                                 | 110.79                                                  | 110.34                                                  |
| Gm38396       | 12.19                                 | 19.71                                                   | 17.02                                                   |
| Zfp820        | 2.88                                  | 5.46                                                    | 4.53                                                    |
| Zfp942        | 7.91                                  | 13.58                                                   | 12.12                                                   |
| Zfp946        | 9.43                                  | 15.1                                                    | 13.57                                                   |
| Tbc1d24       | 25.91                                 | 43.77                                                   | 35.17                                                   |
| Ppt2          | 23.38                                 | 32.77                                                   | 31.23                                                   |
| Vmac          | 15.66                                 | 22.64                                                   | 16.81                                                   |
| Slc25a23      | 179.08                                | 307.72                                                  | 230.01                                                  |
| Galm          | 46.62                                 | 73.36                                                   | 69.25                                                   |
| Fbxo11        | 29.4                                  | 41.07                                                   | 40.87                                                   |
| Wac           | 55.63                                 | 81.53                                                   | 77.35                                                   |
| Dsc2          | 112.75                                | 192.29                                                  | 122.18                                                  |
| Pat1          | 25.02                                 | 39.91                                                   | 39.62                                                   |
| Zdhhc9        | 78.54                                 | 141.52                                                  | 131.2                                                   |
| Mospd2        | 31.8                                  | 47.32                                                   | 47.02                                                   |
| Cox5b         | 88.09                                 | 55.33                                                   | 54.83                                                   |
| Dtymk         | 37.66                                 | 22.58                                                   | 22.17                                                   |
| Prrx1         | 11.68                                 | 3.42                                                    | 1.92                                                    |
| Mrpl41        | 26.04                                 | 14.14                                                   | 13.63                                                   |
| Tmem203       | 14.14                                 | 8.83                                                    | 7.13                                                    |
| Phpt1         | 37.18                                 | 14.95                                                   | 13.4                                                    |
| Adamts12      | 13.34                                 | 4.32                                                    | 3.45                                                    |
| Ak1           | 3.77                                  | 1.4                                                     | 1.35                                                    |
| Ndufa8        | 100.36                                | 56.25                                                   | 49.14                                                   |
| Olfml2a       | 3.33                                  | 0.96                                                    | 0.6                                                     |
| Ppig          | 78.61                                 | 53.94                                                   | 48.83                                                   |
| Nop10         | 31.33                                 | 19.17                                                   | 19.16                                                   |
| Rtf1          | 53.42                                 | 38.64                                                   | 37.61                                                   |
| Serf2         | 307.71                                | 188.33                                                  | 150.22                                                  |
| Hypk          | 90.71                                 | 42.61                                                   | 41.61                                                   |
| Romo1         | 45.41                                 | 15.1                                                    | 12.9                                                    |
| D630003M21Rik | 22.93                                 | 7.39                                                    | 6.64                                                    |
| Pkig          | 24.82                                 | 16.52                                                   | 14.53                                                   |
| Dnrtip1       | 34.82                                 | 22.7                                                    | 20.86                                                   |
| Atp5e         | 137.66                                | 63.21                                                   | 55.58                                                   |
| Ndufc1        | 29.16                                 | 16.46                                                   | 14.33                                                   |
| Apoa1bp       | 51.85                                 | 32.45                                                   | 31.7                                                    |
| Dpm3          | 23.38                                 | 9.25                                                    | 8.27                                                    |
| Mrps21        | 39.44                                 | 22.3                                                    | 22.09                                                   |
| Gm20752       | 9.58                                  | 2.13                                                    | 0.96                                                    |
| Chchd7        | 11.39                                 | 6.53                                                    | 6.49                                                    |
| Svbp          | 14.56                                 | 7.28                                                    | 7.13                                                    |
| Ndufs5        | 11.31                                 | 4.34                                                    | 3.95                                                    |
| Smim12        | 23.12                                 | 15.28                                                   | 14.57                                                   |
| Rnf19b        | 53.5                                  | 37.37                                                   | 34.67                                                   |
| Tmem234       | 78.74                                 | 55.77                                                   | 54.8                                                    |
| Minos1        | 65.6                                  | 37.63                                                   | 34.75                                                   |
| Pdpn          | 4.65                                  | 0.63                                                    | 0.33                                                    |
| Gpr153        | 5.22                                  | 1.55                                                    | 1.49                                                    |
| Fam133b       | 18.78                                 | 10.63                                                   | 10.21                                                   |
| Fzd1          | 19.59                                 | 10.04                                                   | 7.6                                                     |
| Reln          | 42.8                                  | 15.39                                                   | 10.6                                                    |
| Mxd4          | 44.98                                 | 30                                                      | 29.9                                                    |
| Bloc1s4       | 17.43                                 | 10.72                                                   | 9.98                                                    |
| Igfbp7        | 357.64                                | 174.93                                                  | 142.72                                                  |
| Mrps18c       | 22.97                                 | 14.89                                                   | 14.82                                                   |
| BC005561      | 12.22                                 | 7.19                                                    | 5.59                                                    |
| Atp5k         | 43.53                                 | 9.1                                                     | 8.67                                                    |
| Srsf9         | 48.61                                 | 31.14                                                   | 31.01                                                   |

**Supplementary Table S2 (continued)**

| NAME          | $\Delta 90+\text{YAP}^{\text{S127A}}$ | $\Delta 90+\text{YAP}^{\text{S127A}} +\text{NFE2L2-WT}$ | $\Delta 90+\text{YAP}^{\text{S127A}} +\text{L30P/R34P}$ |
|---------------|---------------------------------------|---------------------------------------------------------|---------------------------------------------------------|
| Shfm1         | 59.7                                  | 32.95                                                   | 29.99                                                   |
| Ndufa5        | 44                                    | 22.83                                                   | 22.73                                                   |
| 1110001J03Rik | 17.26                                 | 6.01                                                    | 4.24                                                    |
| Ndufb2        | 42.87                                 | 18.78                                                   | 18.6                                                    |
| Tacstd2       | 5.93                                  | 0.45                                                    | 0.16                                                    |
| Vamp5         | 38.33                                 | 17.02                                                   | 12.8                                                    |
| Bola3         | 27.65                                 | 15.16                                                   | 15.02                                                   |
| Snrpg         | 39.71                                 | 15.42                                                   | 13.65                                                   |
| Brk1          | 86.53                                 | 60.27                                                   | 53.59                                                   |
| Grcc10        | 84.33                                 | 41.3                                                    | 36.24                                                   |
| Lockd         | 4.3                                   | 1.27                                                    | 1.1                                                     |
| H2afj         | 79.1                                  | 38.24                                                   | 26.52                                                   |
| Mgp           | 34.09                                 | 9.23                                                    | 5.29                                                    |
| Ndufa3        | 49.07                                 | 17.08                                                   | 15.61                                                   |
| Tfpt          | 13.97                                 | 8.29                                                    | 7.34                                                    |
| Inafm1        | 14.77                                 | 7.87                                                    | 6.77                                                    |
| Snrpd2        | 61.37                                 | 31.35                                                   | 28.73                                                   |
| Rabac1        | 134.59                                | 87.97                                                   | 82.21                                                   |
| Megf8         | 44.47                                 | 30.63                                                   | 28.7                                                    |
| Eid2          | 6.45                                  | 2.17                                                    | 1.66                                                    |
| Cox7a1        | 1.59                                  | 0.33                                                    | 0.32                                                    |
| Pdcd5         | 37.26                                 | 24.47                                                   | 20.22                                                   |
| Saa2          | 88.94                                 | 8.8                                                     | 7.1                                                     |
| Dkk3          | 9.33                                  | 2.88                                                    | 2.53                                                    |
| Hs3st2        | 16.95                                 | 2.11                                                    | 1.69                                                    |
| Bola2         | 26.13                                 | 11.95                                                   | 10.29                                                   |
| Gm4532        | 1.31                                  | 0.33                                                    | 0.13                                                    |
| Bcl7c         | 42.93                                 | 26.35                                                   | 19.93                                                   |
| Bet1l         | 25.73                                 | 16.9                                                    | 15.55                                                   |
| Pet100        | 11.56                                 | 3.93                                                    | 3.47                                                    |
| Arglu1        | 56.6                                  | 33.91                                                   | 24.37                                                   |
| Ing1          | 36.66                                 | 25.93                                                   | 23.37                                                   |
| Ndufa13       | 83.63                                 | 52.1                                                    | 44.24                                                   |
| Ccdc124       | 46.46                                 | 26.16                                                   | 20.81                                                   |
| Use1          | 64.31                                 | 41.96                                                   | 37.98                                                   |
| D8Ert738e     | 79.73                                 | 55.29                                                   | 50.42                                                   |
| 2310036O22Rik | 99.83                                 | 66.33                                                   | 54.98                                                   |
| Ccdc102a      | 5.92                                  | 1.94                                                    | 1.81                                                    |
| Fam96b        | 27.1                                  | 12.32                                                   | 12.01                                                   |
| Zfx3          | 69.76                                 | 41.45                                                   | 36.16                                                   |
| Ubl5          | 61.43                                 | 39.29                                                   | 34.42                                                   |
| Tmed1         | 29.15                                 | 19.1                                                    | 15.25                                                   |
| Cib2          | 16.92                                 | 8.5                                                     | 4.16                                                    |
| Snapc5        | 24.35                                 | 14.03                                                   | 11.99                                                   |
| Anapc13       | 43.95                                 | 17.88                                                   | 17.69                                                   |
| Ccdc12        | 26.09                                 | 16.54                                                   | 14.97                                                   |
| Higd1a        | 34.72                                 | 20.18                                                   | 18.94                                                   |
| A330049N07Rik | 11.68                                 | 2.51                                                    | 1.38                                                    |
| 2310011J03Rik | 35.93                                 | 23.27                                                   | 21.74                                                   |
| Lsm7          | 33.21                                 | 16.19                                                   | 13.66                                                   |
| Timm13        | 86.81                                 | 42.06                                                   | 40.36                                                   |
| Csrp2         | 115.33                                | 76.28                                                   | 65.79                                                   |
| Arhgef25      | 4.71                                  | 2.11                                                    | 1.89                                                    |
| Cnpy2         | 91.25                                 | 56.58                                                   | 46.61                                                   |
| Cd63          | 167.02                                | 99.57                                                   | 84.42                                                   |
| Selm          | 5.3                                   | 2.22                                                    | 1.66                                                    |
| Mrps24        | 39.66                                 | 26.42                                                   | 24.06                                                   |
| H2afv         | 73                                    | 46.85                                                   | 38.81                                                   |
| Hba-a2        | 11.52                                 | 0.95                                                    | 0.31                                                    |
| Leap2         | 12.08                                 | 4.06                                                    | 3.29                                                    |
| Atox1         | 55.27                                 | 31.38                                                   | 30.41                                                   |
| Dhrs7b        | 28.81                                 | 18.76                                                   | 18.18                                                   |
| Chd3          | 83.13                                 | 54.45                                                   | 47.21                                                   |
| Tmem256       | 41.08                                 | 15.23                                                   | 11.22                                                   |
| Sdf2          | 49.08                                 | 34.19                                                   | 31.53                                                   |
| Supt4a        | 45.51                                 | 27.06                                                   | 23.87                                                   |
| Cuedc1        | 21.71                                 | 10.4                                                    | 8.25                                                    |
| Cbx1          | 50.23                                 | 30.81                                                   | 26.48                                                   |
| P3h4          | 2.67                                  | 0.81                                                    | 0.73                                                    |
| Mrc2          | 13.56                                 | 3.66                                                    | 3.4                                                     |
| Ict1          | 43.68                                 | 28.45                                                   | 25.86                                                   |
| Foxj1         | 4.98                                  | 1.59                                                    | 0.57                                                    |
| Degs2         | 6.24                                  | 2.04                                                    | 0.89                                                    |
| Inhba         | 37.3                                  | 16.11                                                   | 8.02                                                    |
| Sox4          | 118.36                                | 43.03                                                   | 21.15                                                   |

**Supplementary Table S2 (continued)**

| NAME          | $\Delta 90+\text{YAP}^{\text{S127A}}$ | $\Delta 90+\text{YAP}^{\text{S127A}} +\text{NFE2L2-WT}$ | $\Delta 90+\text{YAP}^{\text{S127A}} +\text{L30P/R34P}$ |
|---------------|---------------------------------------|---------------------------------------------------------|---------------------------------------------------------|
| Idnk          | 22.87                                 | 15.34                                                   | 11.45                                                   |
| Med10         | 22.85                                 | 15.81                                                   | 14.86                                                   |
| Ndufs6        | 84.65                                 | 30.36                                                   | 28.51                                                   |
| Cetn3         | 46.2                                  | 31.81                                                   | 31.63                                                   |
| Smim4         | 7.21                                  | 2.86                                                    | 2.44                                                    |
| Gdf10         | 13.81                                 | 3.02                                                    | 2.83                                                    |
| Mmrn2         | 43.63                                 | 10.95                                                   | 9.6                                                     |
| Dpysl2        | 11.07                                 | 5.66                                                    | 4.84                                                    |
| Polr2k        | 16.87                                 | 8.16                                                    | 6.77                                                    |
| Polr2f        | 37.08                                 | 19.83                                                   | 18.18                                                   |
| Cbx6          | 66.82                                 | 39.18                                                   | 24.35                                                   |
| Rps19bp1      | 27.7                                  | 16.83                                                   | 14.56                                                   |
| Smdt1         | 65.94                                 | 44.12                                                   | 36.07                                                   |
| Creld2        | 130.09                                | 46.17                                                   | 43.86                                                   |
| Cox14         | 43.62                                 | 22.36                                                   | 21.61                                                   |
| Smim22        | 2.67                                  | 0.9                                                     | 0.64                                                    |
| Scarf2        | 10.52                                 | 2.93                                                    | 1.93                                                    |
| Ndufb4        | 30.8                                  | 17.58                                                   | 16.17                                                   |
| Atp5j         | 135.76                                | 88.12                                                   | 85.18                                                   |
| Smim11        | 19.48                                 | 11.8                                                    | 8.24                                                    |
| Tmem242       | 52.22                                 | 36.06                                                   | 33.14                                                   |
| Gtf2h5        | 43.61                                 | 30.5                                                    | 29.85                                                   |
| Nme3          | 28.81                                 | 15.28                                                   | 12.82                                                   |
| Fam173a       | 48.82                                 | 27.67                                                   | 25.5                                                    |
| Adamts10      | 18.49                                 | 9.82                                                    | 4.99                                                    |
| Rps18         | 21.23                                 | 11.81                                                   | 10.01                                                   |
| 1110038B12Rik | 25.33                                 | 14.1                                                    | 13.53                                                   |
| Gnl1          | 40.31                                 | 29.68                                                   | 27.71                                                   |
| Polr1c        | 40.75                                 | 26.94                                                   | 26.84                                                   |
| Ptprs         | 84.85                                 | 54.65                                                   | 33.85                                                   |
| Pura          | 49.55                                 | 35.97                                                   | 32.58                                                   |
| Tmem134       | 58.06                                 | 39.35                                                   | 35.99                                                   |
| Ccs           | 138.03                                | 85.71                                                   | 73.39                                                   |
| Ccdc85b       | 61.97                                 | 35.94                                                   | 23.1                                                    |
| Cdc42bpg      | 78.91                                 | 48.71                                                   | 46.07                                                   |
| Trmt112       | 58.9                                  | 41.06                                                   | 40.5                                                    |
| Esrra         | 35.96                                 | 22.5                                                    | 21.97                                                   |
| Bad           | 28.17                                 | 16.61                                                   | 14.42                                                   |
| Ppp1r14b      | 68.89                                 | 33.68                                                   | 31.06                                                   |
| Fkbp2         | 80.32                                 | 49.57                                                   | 42.18                                                   |
| 2700081O15Rik | 23.13                                 | 12.92                                                   | 7.88                                                    |
| Uqcc3         | 29.93                                 | 19.28                                                   | 15.59                                                   |
| Npm3          | 29.93                                 | 17.54                                                   | 15.54                                                   |
| Usmg5         | 68.19                                 | 31.02                                                   | 28.77                                                   |
| Pin4          | 17.98                                 | 9.76                                                    | 9.59                                                    |
| Rpl34         | 7.99                                  | 2.87                                                    | 2.87                                                    |
| Rab26os       | 1.04                                  | 0.13                                                    | 0.13                                                    |
| Ptpn18        | 4.32                                  | 1.43                                                    | 3.13                                                    |
| Sema4c        | 10.09                                 | 5.45                                                    | 6.17                                                    |
| Rpl31         | 377.92                                | 190.37                                                  | 202.11                                                  |
| Fhl2          | 3.84                                  | 1.19                                                    | 1.62                                                    |
| Col3a1        | 159.2                                 | 52.26                                                   | 107.44                                                  |
| Hspe1         | 168.18                                | 79.72                                                   | 85.2                                                    |
| Ndufb3        | 30.73                                 | 18.18                                                   | 21.69                                                   |
| Rpl37a        | 330.55                                | 144.64                                                  | 158.05                                                  |
| Myeov2        | 42.28                                 | 14.58                                                   | 15.73                                                   |
| Fam174a       | 15.22                                 | 9.67                                                    | 11.78                                                   |
| Snrpe         | 31.42                                 | 20.26                                                   | 22.69                                                   |
| Ppfa4         | 9.09                                  | 2.75                                                    | 6.58                                                    |
| Tmem9         | 35.9                                  | 24.07                                                   | 25.44                                                   |
| Rnasel        | 10.24                                 | 3.54                                                    | 7.26                                                    |
| Pfdn2         | 35.06                                 | 18.3                                                    | 19.84                                                   |
| Ackr1         | 1.16                                  | 0.31                                                    | 0.77                                                    |
| Itpkb         | 15.46                                 | 6.4                                                     | 11.26                                                   |
| Hlx           | 6.88                                  | 2.34                                                    | 6.84                                                    |
| Batf3         | 1.7                                   | 0.47                                                    | 1                                                       |
| Fam171a1      | 5.11                                  | 2.28                                                    | 3.24                                                    |
| Celf2         | 23.14                                 | 12.67                                                   | 18.18                                                   |
| Itga8         | 7.81                                  | 2.64                                                    | 4.77                                                    |
| Zmynd19       | 21.18                                 | 13.92                                                   | 16.14                                                   |
| Egfl7         | 22.7                                  | 11.29                                                   | 13.83                                                   |
| Eng           | 51.74                                 | 26.89                                                   | 45.09                                                   |
| Rpl35         | 304.07                                | 167.77                                                  | 202.38                                                  |
| Klhl23        | 5.78                                  | 2.03                                                    | 2.17                                                    |
| 2700094K13Rik | 19.42                                 | 11.56                                                   | 15.57                                                   |

**Supplementary Table S2 (continued)**

| NAME          | $\Delta 90+\text{YAP}^{\text{S127A}}$ | $\Delta 90+\text{YAP}^{\text{S127A}} +\text{NFE2L2-WT}$ | $\Delta 90+\text{YAP}^{\text{S127A}} +\text{L30P/R34P}$ |
|---------------|---------------------------------------|---------------------------------------------------------|---------------------------------------------------------|
| Gm13889       | 4.73                                  | 1.39                                                    | 2.07                                                    |
| Ccdc34        | 23.59                                 | 12.21                                                   | 13.93                                                   |
| Fbn1          | 18.9                                  | 6.02                                                    | 9.79                                                    |
| 1500011K16Rik | 18.11                                 | 8.01                                                    | 8.66                                                    |
| Mrps26        | 35.04                                 | 22.33                                                   | 24.57                                                   |
| Prnd          | 4.74                                  | 0.76                                                    | 1.43                                                    |
| Gm561         | 7.3                                   | 3.44                                                    | 4.23                                                    |
| Top1          | 85.15                                 | 58.31                                                   | 59.99                                                   |
| Mybl2         | 6.07                                  | 2.51                                                    | 3.83                                                    |
| Zfas1         | 31.29                                 | 8.04                                                    | 11.57                                                   |
| Tshz2         | 29.38                                 | 9.74                                                    | 10.04                                                   |
| Rps21         | 264.86                                | 83.27                                                   | 99.66                                                   |
| Rpl22l1       | 83.55                                 | 32.28                                                   | 42.78                                                   |
| Lhfp          | 17.92                                 | 6.51                                                    | 7.17                                                    |
| Smc4          | 78.88                                 | 46.44                                                   | 70.11                                                   |
| Gucy1a3       | 9.28                                  | 3.79                                                    | 5.07                                                    |
| Nes           | 13.98                                 | 5.09                                                    | 5.98                                                    |
| Rps27         | 288.21                                | 125.96                                                  | 141.01                                                  |
| Mrpl9         | 44.34                                 | 30.17                                                   | 33.37                                                   |
| Ctsk          | 3.06                                  | 0.74                                                    | 0.79                                                    |
| Olfml3        | 9.59                                  | 3.47                                                    | 4.33                                                    |
| Lamtor5       | 31.67                                 | 22.46                                                   | 23.97                                                   |
| Shhg8         | 8.68                                  | 3.5                                                     | 3.53                                                    |
| Gar1          | 21.13                                 | 11.22                                                   | 13.12                                                   |
| H2afz         | 116.01                                | 59.48                                                   | 87.7                                                    |
| Clca3a1       | 16.55                                 | 7.31                                                    | 9.22                                                    |
| Ndufb6        | 49.86                                 | 23.35                                                   | 30.32                                                   |
| Tomm5         | 24.13                                 | 14.1                                                    | 18.98                                                   |
| Rgs3          | 15.01                                 | 6.24                                                    | 8.26                                                    |
| Tm2d1         | 16.34                                 | 10.96                                                   | 13.13                                                   |
| Tie1          | 18.19                                 | 7.08                                                    | 11.52                                                   |
| Heyl          | 6.49                                  | 1.82                                                    | 2.53                                                    |
| 1110065P20Rik | 24.6                                  | 13.44                                                   | 13.76                                                   |
| Eva1b         | 9.67                                  | 3.55                                                    | 4.28                                                    |
| Trappc3       | 41.52                                 | 26.67                                                   | 27.75                                                   |
| Gja4          | 5.81                                  | 1.3                                                     | 2.41                                                    |
| Hpca          | 1.9                                   | 0.12                                                    | 0.14                                                    |
| Hdac1         | 30.59                                 | 21.46                                                   | 22.9                                                    |
| Fam167b       | 6.81                                  | 1.68                                                    | 3.13                                                    |
| Med18         | 5.15                                  | 2.36                                                    | 3.42                                                    |
| Hmgn2         | 67.67                                 | 27.93                                                   | 28.93                                                   |
| Stmn1         | 84.74                                 | 42.75                                                   | 56.18                                                   |
| Rpl11         | 435.33                                | 242.69                                                  | 289.01                                                  |
| Gm13056       | 0.96                                  | 0.13                                                    | 0.37                                                    |
| Rpl22         | 193.59                                | 117.63                                                  | 146.4                                                   |
| Tomm7         | 31.27                                 | 11.7                                                    | 12.3                                                    |
| Nos3          | 4.76                                  | 2.34                                                    | 3.58                                                    |
| Cenpa         | 18.64                                 | 9.77                                                    | 13.91                                                   |
| Ost4          | 69.53                                 | 45.57                                                   | 45.81                                                   |
| Emilin1       | 55.28                                 | 14.15                                                   | 23.45                                                   |
| Sorcs2        | 8.26                                  | 0.33                                                    | 0.47                                                    |
| Med28         | 29.91                                 | 21.48                                                   | 21.74                                                   |
| Rpl9          | 413.81                                | 232.36                                                  | 296.61                                                  |
| Plac8         | 11.12                                 | 3.84                                                    | 10.24                                                   |
| 1500011B03Rik | 4.61                                  | 2.02                                                    | 3.05                                                    |
| Pebp1         | 268.37                                | 169.31                                                  | 180.42                                                  |
| Snmp35        | 7.72                                  | 4.03                                                    | 4.39                                                    |
| Eln           | 19.24                                 | 5.22                                                    | 5.72                                                    |
| Pdap1         | 91.05                                 | 60.23                                                   | 66.68                                                   |
| Rpa3          | 11.28                                 | 6.64                                                    | 6.72                                                    |
| Lsm8          | 12.11                                 | 7.32                                                    | 8.56                                                    |
| Gimap6        | 9.08                                  | 3.44                                                    | 6.55                                                    |
| Aqp1          | 53.56                                 | 20.64                                                   | 46.62                                                   |
| Lsm5          | 8.8                                   | 4.77                                                    | 5                                                       |
| Dysf          | 13.19                                 | 4.53                                                    | 12.32                                                   |
| Fgd5          | 7.15                                  | 3.28                                                    | 5.24                                                    |
| Rpl32         | 400.38                                | 215.5                                                   | 270.63                                                  |
| Plxd1         | 60.17                                 | 28.66                                                   | 48.25                                                   |
| Gm8203        | 61.79                                 | 29.32                                                   | 52.98                                                   |
| P3h3          | 7.31                                  | 2.61                                                    | 3.11                                                    |
| Ccnd2         | 24.47                                 | 9.78                                                    | 12.75                                                   |
| Rerg          | 2.99                                  | 1.01                                                    | 1.47                                                    |
| U2af2         | 120.04                                | 85.45                                                   | 89.95                                                   |
| Tmem160       | 36.31                                 | 21.27                                                   | 22.09                                                   |
| Exoc3l2       | 7.96                                  | 2.31                                                    | 3.98                                                    |



**Supplementary Table S2 (continued)**

| NAME          | $\Delta 90+YAP^{S127A}$ | $\Delta 90+YAP^{S127A} +NFE2L2-WT$ | $\Delta 90+YAP^{S127A} +L30P/R34P$ |
|---------------|-------------------------|------------------------------------|------------------------------------|
| Rps19         | 372.35                  | 184.52                             | 215.17                             |
| Ltbp4         | 35.35                   | 13.66                              | 16.95                              |
| Rps16         | 505.76                  | 235.39                             | 295.09                             |
| Polr2i        | 15.12                   | 9.53                               | 11.56                              |
| Tyrobp        | 27.79                   | 11.38                              | 25.73                              |
| Clec11a       | 2.54                    | 0.94                               | 1.04                               |
| Rcn3          | 9.4                     | 2.38                               | 4.75                               |
| Rps11         | 425.19                  | 231                                | 270.31                             |
| Rpl13a        | 1089.24                 | 532.05                             | 576.18                             |
| Rpl18         | 473.29                  | 251.45                             | 304.27                             |
| Chsy1         | 8.41                    | 4.07                               | 5.99                               |
| Igflr         | 30.47                   | 6.07                               | 10.6                               |
| Rps17         | 334.86                  | 178.01                             | 214.05                             |
| Ndufc2        | 47.01                   | 32.14                              | 32.37                              |
| Serpinh1      | 48.5                    | 17.63                              | 20.7                               |
| Rps3          | 602.17                  | 330.12                             | 415.74                             |
| Tmem159       | 8.8                     | 4.37                               | 4.99                               |
| 4930413G21Rik | 5.52                    | 2.47                               | 2.61                               |
| Hirp3         | 13.03                   | 7.15                               | 10.73                              |
| Ctbp2         | 8.47                    | 2.97                               | 4.62                               |
| Rplp2         | 273.98                  | 165.52                             | 189.24                             |
| Tssc4         | 28.95                   | 16.58                              | 19.36                              |
| Osbp15        | 4.65                    | 2.31                               | 3.24                               |
| Gins4         | 23.07                   | 16.55                              | 18.16                              |
| Adgra2        | 11.21                   | 3.44                               | 6.73                               |
| Hand2         | 3.71                    | 0.97                               | 2.07                               |
| Hmgb2         | 55.2                    | 25.67                              | 41.42                              |
| Nr2c2ap       | 23.28                   | 15.57                              | 17.68                              |
| Lsm4          | 38.06                   | 19.61                              | 22.38                              |
| Mpv17l2       | 22.06                   | 14.78                              | 14.91                              |
| Ushbp1        | 10.72                   | 4.98                               | 5.23                               |
| Ankle1        | 3.79                    | 1.38                               | 2.49                               |
| Plvap         | 51.69                   | 21.56                              | 42.93                              |
| Cklf          | 2.57                    | 1.12                               | 1.14                               |
| Exoc3l        | 3.89                    | 1.54                               | 2.68                               |
| Glg1          | 76.72                   | 48.08                              | 59.13                              |
| Maf           | 32.39                   | 10.66                              | 30.09                              |
| Hsbp1         | 101.57                  | 67.64                              | 70.02                              |
| Gins2         | 10.96                   | 4.72                               | 10.6                               |
| Irf8          | 24.14                   | 10.06                              | 20.69                              |
| Cyba          | 23.48                   | 9.73                               | 20.5                               |
| Amotl1        | 30.37                   | 6.6                                | 8.49                               |
| Pin1          | 37.53                   | 21.23                              | 23.21                              |
| Cdkn2d        | 9.33                    | 5.36                               | 5.49                               |
| Spc24         | 15.43                   | 7                                  | 10.21                              |
| Gm10698       | 41.24                   | 13.39                              | 21.2                               |
| Esam          | 21.02                   | 9.57                               | 12.75                              |
| Il10ra        | 12.28                   | 6.07                               | 12.27                              |
| Tagln         | 11.61                   | 3.82                               | 6.46                               |
| Rps27l        | 155.95                  | 96.54                              | 101.68                             |
| Chst2         | 11.57                   | 2.71                               | 4.2                                |
| Itga9         | 34.84                   | 17.8                               | 31.52                              |
| Vipr1         | 10.94                   | 3.12                               | 6.31                               |
| Fbxo5         | 5.84                    | 2.52                               | 4.3                                |
| Tcf21         | 2.21                    | 0.57                               | 1.05                               |
| Ctgf          | 78.78                   | 39.39                              | 41.1                               |
| Rspo3         | 2.58                    | 0.6                                | 1.18                               |
| Cenpw         | 3.61                    | 1.14                               | 1.68                               |
| Hint3         | 18.58                   | 11.61                              | 12.39                              |
| Fyn           | 9.83                    | 4.63                               | 8.24                               |
| Snrpd3        | 52.32                   | 28.76                              | 35.36                              |
| Derl3         | 22.35                   | 3.98                               | 6.94                               |
| Oaz1          | 492.97                  | 249.73                             | 322.34                             |
| Arl1          | 66.35                   | 44.04                              | 48.73                              |
| Ndufa12       | 34.45                   | 18.52                              | 19.29                              |
| Mettl1        | 19.93                   | 12.72                              | 14.41                              |
| Ddit3         | 43.54                   | 20.69                              | 23.06                              |
| Gpr182        | 10.03                   | 3.57                               | 9.23                               |
| Sec61g        | 73.18                   | 34.24                              | 35.67                              |
| Stc2          | 17.23                   | 6.73                               | 17.09                              |
| Hint1         | 194.96                  | 112.61                             | 124.97                             |
| Grp           | 3.66                    | 1.49                               | 3.37                               |
| 2410006H16Rik | 43.03                   | 17.86                              | 29.13                              |
| Tvp23b        | 40.04                   | 27.48                              | 30.46                              |
| Gas7          | 20.99                   | 8.25                               | 9.69                               |

**Supplementary Table S2 (continued)**

| NAME          | $\Delta 90+YAP^{S127A}$ | $\Delta 90+YAP^{S127A} +NFE2L2-WT$ | $\Delta 90+YAP^{S127A} +L30P/R34P$ |
|---------------|-------------------------|------------------------------------|------------------------------------|
| Arhgef15      | 6.76                    | 2.95                               | 4.81                               |
| Pfas          | 18.64                   | 12.21                              | 15.19                              |
| Naa38         | 18.11                   | 10.14                              | 10.62                              |
| Tmem88        | 2.23                    | 0.83                               | 2.03                               |
| Fam64a        | 3.83                    | 0.67                               | 1.96                               |
| Fam101b       | 8.24                    | 3.54                               | 5.36                               |
| Al662270      | 7.92                    | 2.68                               | 7.04                               |
| Tbx2          | 9.54                    | 2.02                               | 3.34                               |
| Ngfr          | 5.83                    | 1.41                               | 3.12                               |
| Gngt2         | 7.28                    | 2.53                               | 5.45                               |
| Krt10         | 2.52                    | 0.76                               | 0.88                               |
| Krt19         | 10.05                   | 2.27                               | 5.82                               |
| Rpl27         | 320.62                  | 172.54                             | 199.99                             |
| Icam2         | 3.31                    | 1.51                               | 3.22                               |
| Rpl38         | 157.12                  | 57.26                              | 69.11                              |
| Ten1          | 3.61                    | 1.65                               | 3.28                               |
| Cygb          | 44.27                   | 12.66                              | 14.11                              |
| Mxra7         | 8.21                    | 2.39                               | 3.34                               |
| Alyref        | 45.37                   | 18.49                              | 21.45                              |
| Colec11       | 25.86                   | 7.75                               | 19.31                              |
| Pxdn          | 14.22                   | 5.24                               | 10.94                              |
| Gm5785        | 6.67                    | 3.61                               | 4.57                               |
| Psma6         | 97.36                   | 67.88                              | 68.85                              |
| Nfkbia        | 48.28                   | 32.95                              | 36.77                              |
| Rps29         | 229.39                  | 47.82                              | 59.9                               |
| Lrr1          | 1.53                    | 0.49                               | 0.98                               |
| Rpl36al       | 209.73                  | 134.15                             | 136.87                             |
| Rhoj          | 4.05                    | 1.54                               | 2.61                               |
| Churc1        | 19.16                   | 8.47                               | 10.78                              |
| Vti1b         | 58.5                    | 41.25                              | 41.74                              |
| Acyp1         | 5.33                    | 2.44                               | 3.3                                |
| Tgfb3         | 18.6                    | 5.39                               | 11.27                              |
| Vash1         | 21.62                   | 6.62                               | 9.67                               |
| Slirp         | 19.94                   | 8.9                                | 9.14                               |
| Ifi2712a      | 12.35                   | 4.44                               | 11.47                              |
| Ckb           | 12.03                   | 5.67                               | 10.47                              |
| 2010107E04Rik | 53.69                   | 26.47                              | 28.2                               |
| Stard3nl      | 23.08                   | 16.12                              | 18.83                              |
| Gmnn          | 13.43                   | 7.86                               | 11.58                              |
| Myip          | 7.91                    | 3.27                               | 7.56                               |
| S1pr3         | 4.22                    | 1.41                               | 2.75                               |
| Mxd3          | 7.5                     | 2.63                               | 3.95                               |
| Tmed9         | 168.6                   | 89.3                               | 94.07                              |
| Pcbd2         | 20.32                   | 9.28                               | 10.65                              |
| Hnrnpa0       | 228.73                  | 137.88                             | 150.02                             |
| Cox7c         | 135.61                  | 52.75                              | 57.02                              |
| Rps23         | 402.08                  | 162.3                              | 212.99                             |
| Tbca          | 77.78                   | 34.32                              | 36.66                              |
| Nduraf2       | 10.42                   | 5.72                               | 5.86                               |
| Plpp1         | 9.61                    | 5.26                               | 8.92                               |
| Ube2e2        | 35.83                   | 23.99                              | 28.01                              |
| Nt5dc2        | 13.04                   | 6.57                               | 12.49                              |
| Fam25c        | 72.93                   | 14.99                              | 16.69                              |
| Psmb5         | 34.91                   | 19.56                              | 26.8                               |
| Mphosph8      | 24.93                   | 16.02                              | 21.86                              |
| Mrpl57        | 25.34                   | 14.51                              | 16.95                              |
| Pdim2         | 4.65                    | 1.26                               | 2.96                               |
| Zc3h13        | 36.9                    | 23.65                              | 30.1                               |
| Commd6        | 27.61                   | 17.72                              | 18.54                              |
| Rpl37         | 244.48                  | 108.5                              | 121.33                             |
| Sub1          | 66.83                   | 41.44                              | 43.42                              |
| Rpl30         | 39.53                   | 19.2                               | 21.45                              |
| Cox6c         | 108.64                  | 66.95                              | 67.24                              |
| Eny2          | 66.04                   | 46.31                              | 47.52                              |
| Col14a1       | 43.94                   | 15.66                              | 37.43                              |
| Ptp4a3        | 24.09                   | 10.5                               | 15.69                              |
| Gpihbp1       | 14.75                   | 5.04                               | 11.38                              |
| Scx           | 4.93                    | 0.48                               | 0.57                               |
| Cyth4         | 30.5                    | 13.49                              | 29.85                              |
| Mapk12        | 3.26                    | 1.24                               | 1.85                               |
| Shank3        | 9.77                    | 4.66                               | 5.29                               |
| Ccnt1         | 12.44                   | 7.47                               | 8.91                               |
| Hnrnpa1       | 195.21                  | 131.21                             | 176.8                              |
| Sdf2l1        | 70.64                   | 32.09                              | 34.75                              |
| Cldn5         | 10.31                   | 2.58                               | 5.77                               |

**Supplementary Table S2 (continued)**

| NAME          | $\Delta 90+\text{YAP}^{\text{S127A}}$ | $\Delta 90+\text{YAP}^{\text{S127A}} + \text{NFE2L2-WT}$ | $\Delta 90+\text{YAP}^{\text{S127A}} + \text{L30P/R34P}$ |
|---------------|---------------------------------------|----------------------------------------------------------|----------------------------------------------------------|
| Rpl35a        | 44.39                                 | 13.48                                                    | 14.24                                                    |
| Fstl1         | 25.39                                 | 8.6                                                      | 13.82                                                    |
| Cox17         | 31.4                                  | 15.26                                                    | 15.74                                                    |
| Ccdc80        | 40.64                                 | 10.85                                                    | 17.4                                                     |
| Rpl24         | 344.45                                | 222.2                                                    | 233.83                                                   |
| Cldn8         | 2.73                                  | 0.05                                                     | 0.06                                                     |
| Erg           | 6.01                                  | 2.56                                                     | 4.79                                                     |
| Tmem181a      | 6.28                                  | 2.8                                                      | 5.23                                                     |
| Sft2d1        | 25.55                                 | 16.08                                                    | 19.21                                                    |
| Neur1b        | 17.68                                 | 8.13                                                     | 11.18                                                    |
| Kifc5b        | 5.83                                  | 2.39                                                     | 3.64                                                     |
| Uqcc2         | 28.71                                 | 11.99                                                    | 12.03                                                    |
| Lemd2         | 57.46                                 | 32.21                                                    | 35.14                                                    |
| Mtch1         | 129.13                                | 85.6                                                     | 93.44                                                    |
| Fgd2          | 13.39                                 | 5.63                                                     | 13.14                                                    |
| Kank3         | 8.05                                  | 4.28                                                     | 4.87                                                     |
| Rps28         | 190.68                                | 58.36                                                    | 60.68                                                    |
| Ndufa7        | 63.75                                 | 41.62                                                    | 42.33                                                    |
| Pfdn6         | 34.17                                 | 19.77                                                    | 22.13                                                    |
| H2-Eb1        | 5.81                                  | 1.79                                                     | 2.66                                                     |
| Mrpl14        | 64.81                                 | 33.85                                                    | 44.69                                                    |
| Mea1          | 55.16                                 | 33.77                                                    | 34.43                                                    |
| 2410015M20Rik | 71.93                                 | 27.65                                                    | 31.33                                                    |
| Alkbh7        | 12.28                                 | 6.45                                                     | 6.87                                                     |
| Rab31         | 17.21                                 | 9.68                                                     | 15.7                                                     |
| Ralbp1        | 92.2                                  | 65.57                                                    | 72.13                                                    |
| Trmt61b       | 5.41                                  | 2.86                                                     | 3.02                                                     |
| Lbh           | 24.12                                 | 8.97                                                     | 17.57                                                    |
| Ehd3          | 23.97                                 | 7.55                                                     | 15.99                                                    |
| Cebpzoz       | 13.39                                 | 8.75                                                     | 9.85                                                     |
| Zmat2         | 47.98                                 | 34.03                                                    | 36.01                                                    |
| Arap3         | 14.32                                 | 6.9                                                      | 10.37                                                    |
| Pcdh12        | 6.53                                  | 2.76                                                     | 4.33                                                     |
| Tnfaip8       | 7.4                                   | 3.52                                                     | 6.71                                                     |
| Ppic          | 11.71                                 | 4.99                                                     | 9.68                                                     |
| Tcf4          | 35.85                                 | 15.64                                                    | 17.6                                                     |
| Ier3ip1       | 26.89                                 | 17.36                                                    | 18.16                                                    |
| Banf1         | 56.49                                 | 34.36                                                    | 36.46                                                    |
| Drap1         | 96.56                                 | 41.58                                                    | 46.89                                                    |
| Sipa1         | 37.44                                 | 23.83                                                    | 24.9                                                     |
| Fau           | 444.8                                 | 232.19                                                   | 249.76                                                   |
| Ccdc88b       | 13.39                                 | 6.08                                                     | 10.37                                                    |
| Prdx5         | 183.54                                | 120.57                                                   | 134.32                                                   |
| Polr2g        | 25.72                                 | 16.9                                                     | 17.48                                                    |
| Tmem258       | 48.26                                 | 17.29                                                    | 18.73                                                    |
| Gnaq          | 39.15                                 | 28.43                                                    | 35.64                                                    |
| Add3          | 24.69                                 | 13.06                                                    | 15.35                                                    |
| Ndufb11       | 115.47                                | 59.53                                                    | 65.66                                                    |
| Ndufa1        | 35.39                                 | 12.82                                                    | 13.7                                                     |
| Ssr4          | 101.49                                | 65.24                                                    | 81.01                                                    |
| Lage3         | 23.19                                 | 15.43                                                    | 15.7                                                     |
| Las1l         | 43.24                                 | 31.93                                                    | 39.36                                                    |
| Cox7b         | 75.35                                 | 49.31                                                    | 58.99                                                    |
| Rpl36a        | 190.44                                | 131.2                                                    | 148.77                                                   |
| Armcx4        | 12.17                                 | 2.12                                                     | 6.48                                                     |
| Armcx2        | 4.54                                  | 1.45                                                     | 3.18                                                     |
| Ngfrap1       | 20.58                                 | 11.5                                                     | 14.1                                                     |
| Psmc10        | 22.64                                 | 16.24                                                    | 19.61                                                    |
| Mageh1        | 2.89                                  | 1.4                                                      | 2.49                                                     |
| Eif1ax        | 44.28                                 | 30.61                                                    | 38.27                                                    |
| Itih5         | 13.77                                 | 37.45                                                    | 5.83                                                     |
| A530020G20Rik | 2.73                                  | 6.08                                                     | 2.33                                                     |
| Ppbp          | 3.32                                  | 18.82                                                    | 3.01                                                     |
| Zfp605        | 10.52                                 | 16.28                                                    | 10.41                                                    |
| Atoh8         | 26.18                                 | 57.85                                                    | 23.54                                                    |
| Anpep         | 148.16                                | 213.13                                                   | 144.83                                                   |
| Zfp868        | 17.01                                 | 25.24                                                    | 15.3                                                     |
| Elovl2        | 222.37                                | 466.57                                                   | 194.98                                                   |
| Phf11d        | 7.58                                  | 13.98                                                    | 6.71                                                     |
| Thpo          | 16.45                                 | 25.23                                                    | 14.93                                                    |
| Lims2         | 77.18                                 | 126.74                                                   | 66.89                                                    |
